# Supplementary material for: Genetic characterization of Neisseria meningitidis isolates recovered from patients with invasive meningococcal disease in Lithuania
Source: PubMed Central journal article supplement (PMC11513629; doi:10.3389/fcimb.2024.1432197), 2024-10-14

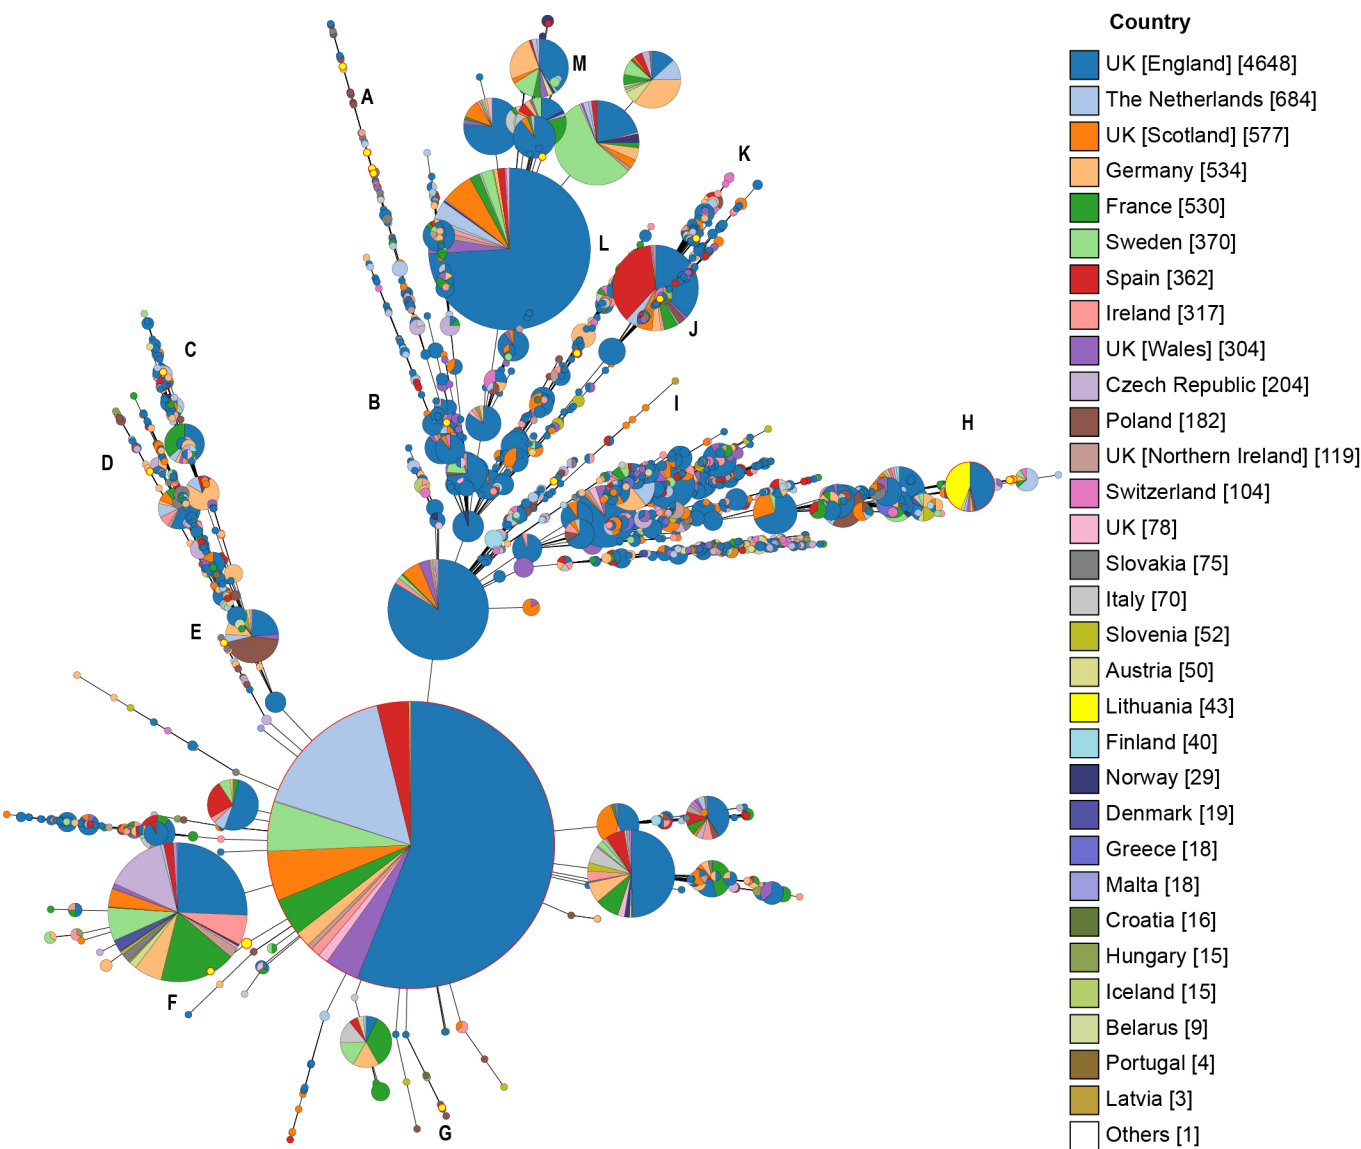

**Supplementary Figure S1** The minimum spanning tree based on the results of cgMLST for publicly available *N. meningitidis* isolates. The MST is displayed using log-scale collapsed branches for allele distances of <100. The size of each circle is proportional to the number of strains it contains. The colors indicate the corresponding countries of isolation. The nodes with a red circle indicate those which include Lithuanian isolates. Each branch containing Lithuanian isolates is labeled **A - M** in the figure, with expanded branches shown in Supplementary Figure S2 to illustrate all branches (allele distances of  $\geq 1$ ) between Lithuanian isolates and the nearest root node with close relatives.

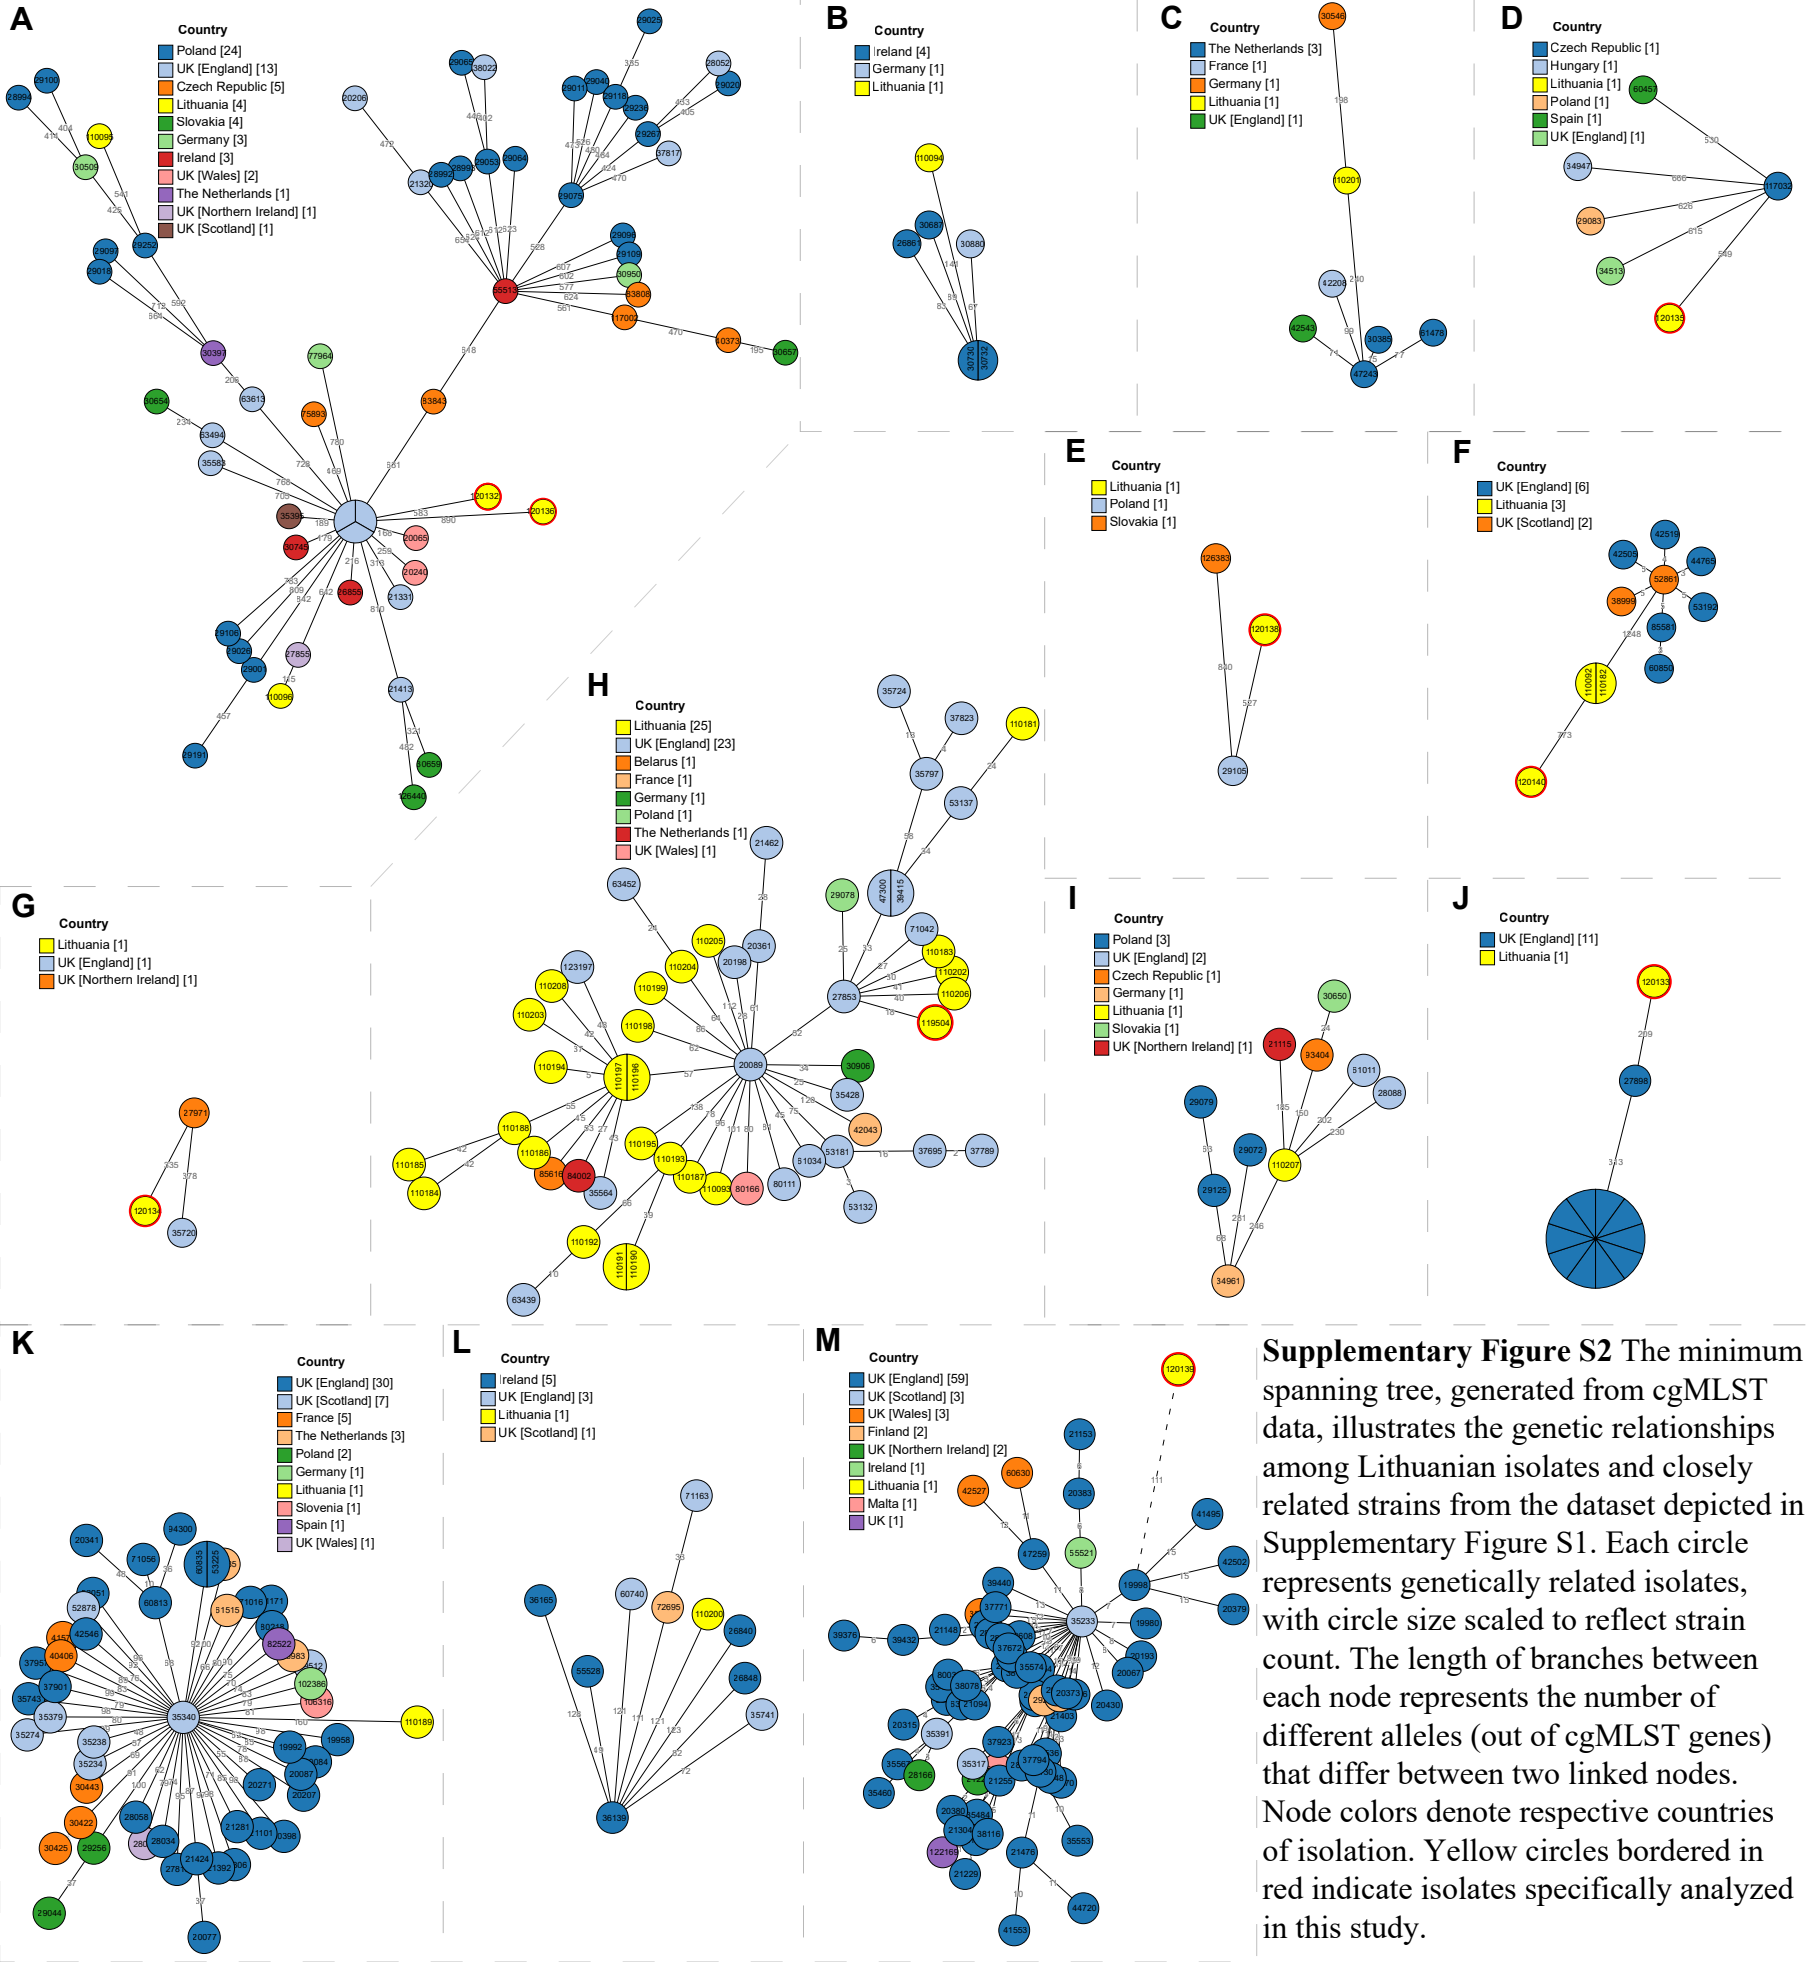

Supplement: DataSheet1.pdf [file DataSheet1.pdf]
