# Supplementary material for: Genetic characterization of Neisseria meningitidis isolates recovered from patients with invasive meningococcal disease in Lithuania
Source: PubMed Central journal article supplement (PMC11513629; doi:10.3389/fcimb.2024.1432197), 2024-10-14
Supplement: DataSheet3.pdf [file DataSheet3.pdf]

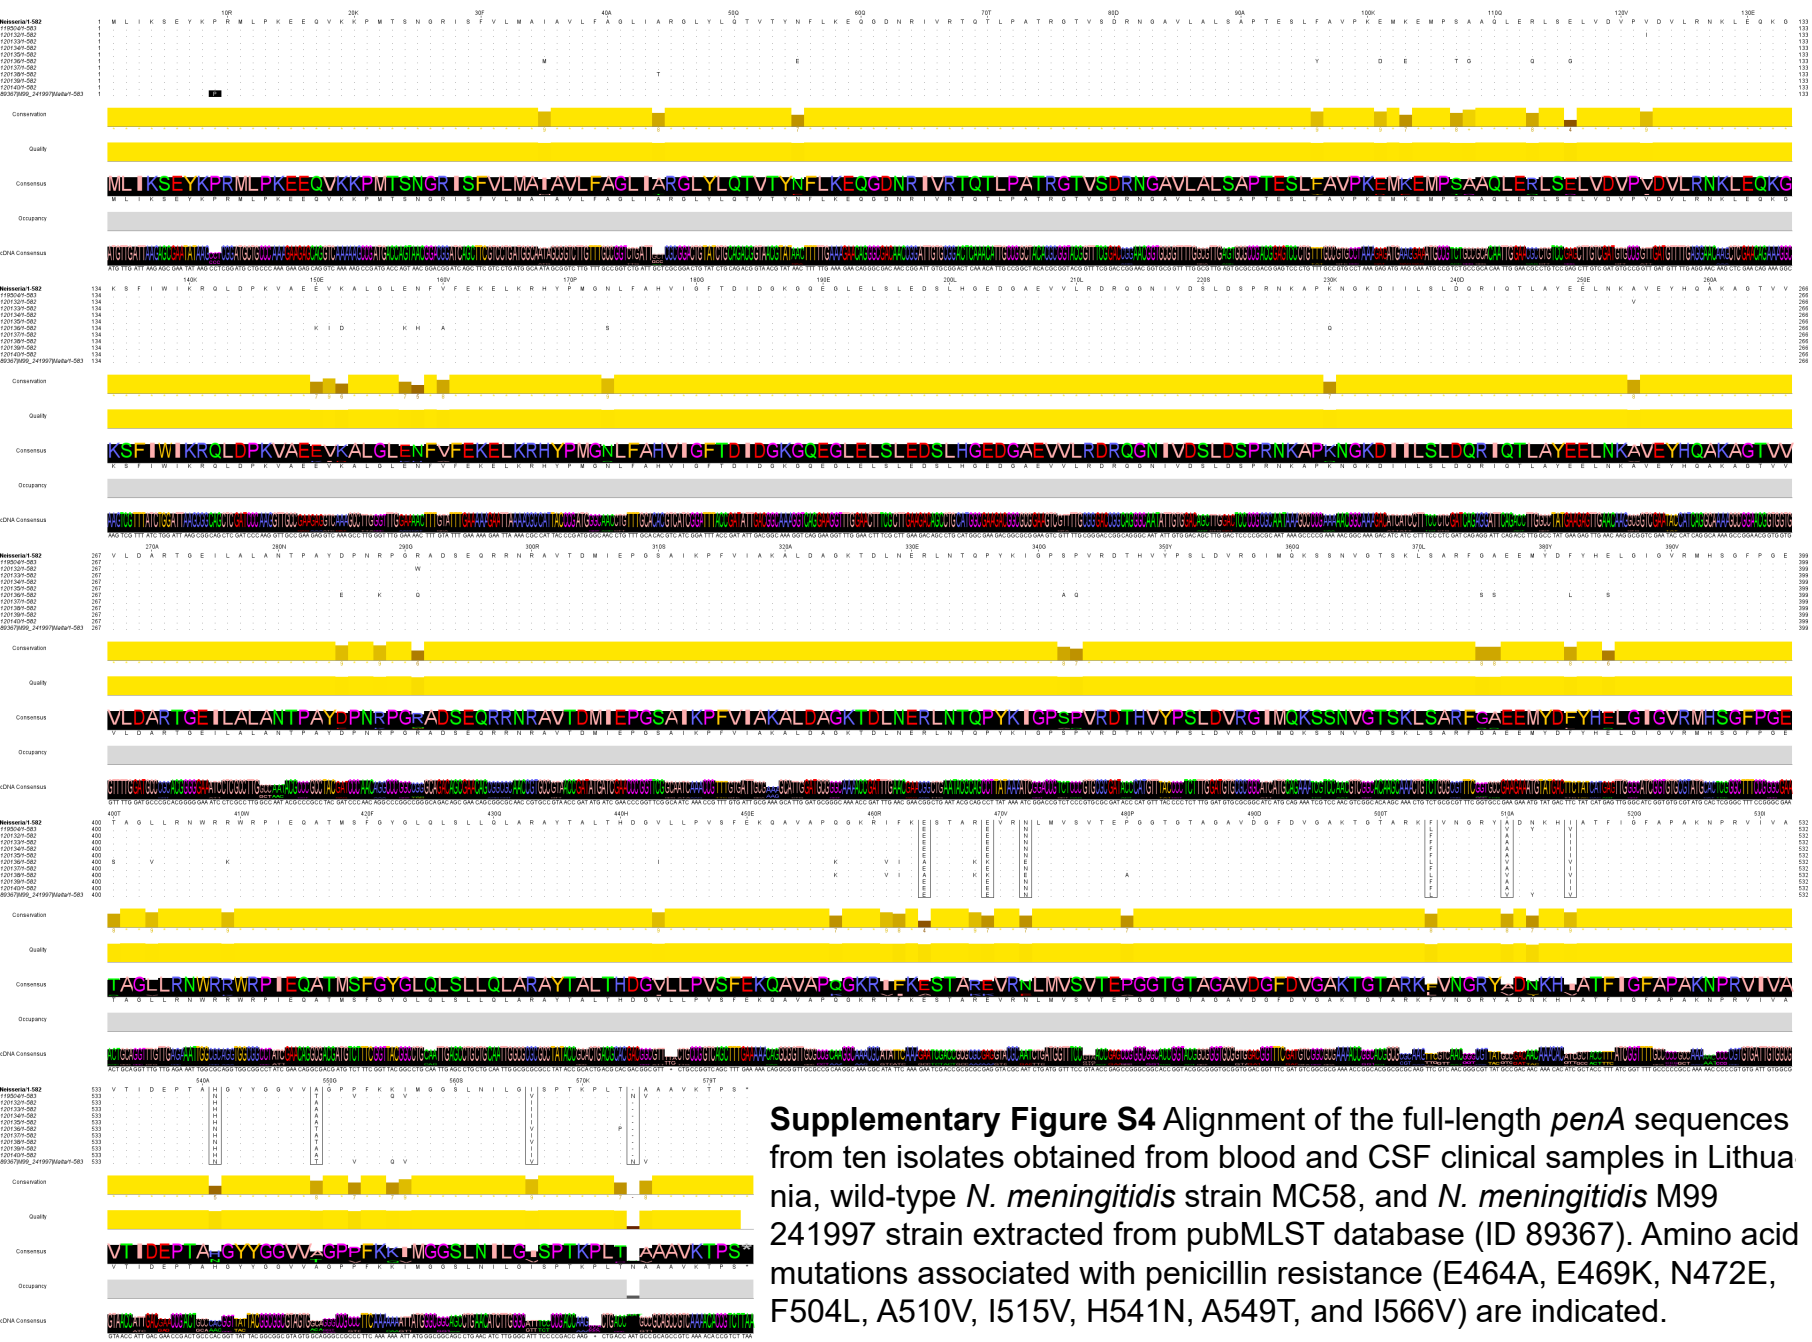

**Supplementary Figure S4** Alignment of the full-length *penA* sequences from ten isolates obtained from blood and CSF clinical samples in Lithuania, wild-type *N. meningitidis* strain MC58, and *N. meningitidis* M99 241997 strain extracted from pubMLST database (ID 89367). Amino acid mutations associated with penicillin resistance (E464A, E469K, N472E, F504L, A510V, I515V, H541N, A549T, and I566V) are indicated.
